# Supplementary material
Source: PubMed Central journal article supplement (PMC8009836)
Supplement: NIHMS1673296-supplement-Supplemental_Publication_Material.pdf [file NIHMS1673296-supplement-Supplemental_Publication_Material.pdf]

## SUPPLEMENTAL INFORMATION FOR GACITA ET AL. “GENETIC VARIATION IN ENHANCERS MODIFIES CARDIOMYOPATHY GENE EXPRESSION AND PROGRESSION”

### EXPANDED METHODS

**Epigenetic Datasets.** For histone ChIP-Seq datasets and ATAC-seq datasets, the “fold change over negative control” bigwig file was used. For transcription factor Chip-seq datasets, peak bed files were used. For Homer computational predictions, a bed file representing the location of the transcription factor motif genome-wide was used. Files were imported into the UCSC genome browser for visualization. When necessary, datasets from mouse cells/tissues or hg38 were overlaid to hg19 using the UCSC liftover tool. For pChIC data, the CHiCAGO pipeline raw output of three replicates of IPSC-CM promoter capture Hi-C data were downloaded.<sup>19</sup> Probe-probe interactions were filtered. 1kb was added to both ends of regions interacting with gene promoters. We intersected data from each replicate using bedtools and retained only genomic interactions that were present in at least two replicates.<sup>14</sup> Bed files representing pChIC interactions were visualized in the UCSC genome browser.

**Enhancer constructs.** Candidate enhancer regions were amplified from human genomic DNA using primers with a 5'-CACC overhang using Phusion High-Fidelity DNA polymerase (NEB). An aliquot of the PCR reaction was separated on a 1% agarose-TBE gel to confirm amplification, and the remaining reaction was purified using a PCR Purification Kit (Qiagen). In cases where PCR failed to generate an adequate product, the enhancer region sequence (matching hg19) was synthesized as a dsDNA gBlock gene fragment (IDT). Approximately 5ng of PCR product or gBlock was ligated into the pENTR/D-TOPO vector following manufacturer's instructions (ThermoFisher). The enhancer region was recombined into pGL4.23-GW (Addgene #60323) using LR Clonase II Enzyme mix (Thermo) with 150ng of each plasmid. EndoFree Maxipreps (Qiagen) were used to prepare DNA. Plasmids were confirmed using Sanger Sequencing. In all candidate enhancer plasmids, the enhancer sequence was located 125bp upstream of the minimal promoter sequence. PCR primers and the genomic regions amplified for each construct are shown in are shown in **Table II in the Supplement**.

**Detailed HL-1 Luciferase Assay.** Twenty-four hours before transfection, 140,000 HL-1 cells per well were plated on to a 12-well plate. On the day of transfection, HL-1 cells were transfected using Lipofecamine 3000 (Thermo Fisher) following manufacturer's instructions. Each well was transfected with 6 $\mu$ l of 0.15 $\mu$ M enhancer firefly luciferase plasmid, 50ng of pRL-SV40 (Promega), 2.5 $\mu$ l of Lipofecamine3000, and 6 $\mu$ l of P3000 in 100 $\mu$ l of Opti-MEM. Cells were allowed to incubate for 6-8 hours, following which half the media was replaced with Claycomb media. Forty-eight hours after transfection, the luciferase assay was performed with the Dual-Glo luciferase assay kit (Promega) according to manufacturer's instructions.

**IPSC Reprogramming, Culturing, and IPSC-CM Differentiation.** Human skin fibroblasts were obtained from Coriell (sample name GM03348, 10 year old male) and cultured in DMEM containing 10% FBS. Fibroblasts were re-programmed into induced pluripotent stem cells (IPSCs) via electroporation with pCXLE-hOCT3/4-shp53-F (Addgene plasmid 27077), pCXLE-hSK (Addgene plasmid 27078), and pCXLE-hUL (Addgene plasmid 27080) as described previously.<sup>43</sup> IPSCs were maintained on Matrigel-coated 6-well plates with mTeSR-1 (Stem Cell technologies, Cat#85850) and passaged as colonies every 5-7 days using ReLeSR (Stem Cell technologies, Cat#05872).

IPSCs were differentiated into cardiomyocytes (IPSC-CMs) using Wnt modulation as previously described.<sup>11</sup> Differentiation was conducted in CDM3 (RPMI 1640 with L-glutamine, 213  $\mu$ g/mL L-ascorbic acid 2-phosphate, 500 $\mu$ g/mL recombinant human albumin).<sup>11</sup> Cells were

grown to ~95% confluency and treated with 6 $\mu$ M - 10 $\mu$ M CHIR99021 for 24 hours and allowed to recover for 24 hours. Cells were treated with 2 $\mu$ M Wnt-C59 for 48 hours and then media was changed with CDM3 every two days until beating cardiomyocytes were obtained (~day 6-10). In order to prevent cell detachment, beating cardiomyocytes re-plated on to new plates using TrypLE (Thermo Fisher). Media was changed every two days until downstream assays were performed (~day 20).

**CRISPr Enhancer Deletion in iPSCs.** To delete enhancer regions, guides targeting the 5' and 3' end of enhancer regions were designed using CRISPOR.<sup>44</sup> Guides are shown in **Table II in the Supplement**. Guides were ligated into pSpCas9(BB)-2A-Puro (Addgene plasmid #62988) after the U6 promoter using either Bbs1 digestion and ligation or Gibson assembly. DNA preparations of plasmid were prepared using an EndoFree plasmid kit (Qiagen), and plasmid sequences were confirmed with Sanger sequencing. iPSCs were nucleofected using the Neon transfection system (Thermo Fisher). Briefly, GM03348 iPSCs were grown to ~70% confluency and treated with mTeSR-1 containing 2 $\mu$ M thiazovivin (TZV) for one hour. Cells were digested with TrypLE, collected and counted. 3.75 million iPSCs per nucleofection were pelleted at 300g for 3min. Cell pellets were resuspended in 125 $\mu$ l of buffer R and added to an Eppendorf tube containing 1.5 $\mu$ g or 2.5 $\mu$ g of each plasmid. Cells were nucleofected in the Neon system in a 100 $\mu$ l tip with the following settings: 1400 V, 20 ms, 2 pulses. Nucleofected cells were expelled into a single well of Matrigel-coated 6-well plate containing mTeSR-1 supplemented with ClonR (Stem Cell Technologies, Cat#05888) and 2 $\mu$ M TZV. For each round, a pSpCas9(BB)-2A-GFP (Addgene plasmid #48138) control was included. Twenty-four hours later, cells were treated with mTeSR-1 containing 0.15 $\mu$ g/mL puromycin. The next day, selection was continued with 0.2 $\mu$ g/mL puromycin until no viable cells were seen in the GFP control (~2-3 days). Cells were switched to mTeSR-1 supplemented with ClonR and 2 $\mu$ M TZV and media was changed daily until colonies appeared (5-7 days). Colonies were picked on to 96-well plates, expanded, and split on to two duplicate plates. The first plate was used for cryopreservation in 50% mTeSR-1/ClonR/2 $\mu$ M TZV and 50% KnockOut Serum replacement/25% DMSO. The second plate was processed for gDNA isolation using the DirectPCR lysis reagent (Viagen, Cat#301-C) following manufacturer's instructions. Colonies were screened for successful enhancer deletion using a 3-primer PCR approach. PCR products were cloned using the TOPO TA cloning kit (Thermo Fisher) and sequenced to determine alleles present. Positive colonies were thawed from the frozen plate, expanded, re-genotyped, and used for differentiation. In cases where no homozygous deletions were obtained, a heterozygous colony was treated with a second round of CRISPr editing.

**iPSC Chromosome Analysis and CRISPr-Off Target Analysis.** iPSC Chromosome analysis was conducted using the hPSC genetic analysis kit (Stem Cell Technologies, Cat#07550) following manufacturer's instructions. iPSC lines must show no amplification or deletion in at least 8 of the 9 tested sites to pass our karyotypic quality control standards. We used the output from the CRISPOR<sup>44</sup> guide design tool to identify the most likely off target cut sites. We selected any regions with < 3 mismatches and additional off targets that were within or near genes important for cardiac function. Primers were designed to amplify putative off target sites and regions were amplified from gene edited cell gDNA. PCR products were purified using ExoSAP-IT (Thermo) or Ampure XP beads (Beckman Coulter) and sequenced with sanger sequencing. Primers used are available upon request. Sanger traces from unedited iPSCs were compared to gene edited lines to identify any off-target changes. Genotype of enhancer deleted cells are shown in **Table VI in the Supplement**. Off-target analysis is shown in **Table V in the Supplement**.

**IPSC-CM RNA Extraction and qPCR.** At ~day 10 of differentiation, 1 million IPSC-derived cardiomyocytes were plated on a well of 12-well plate. At ~day 20, cells were washed with PBS and 400 $\mu$ l of TRIzol (Thermo Fisher) was added directly to the well. Cells were collected into an Eppendorf tube using a cell scraper. Trizol was kept at -80°C until further processing. Six hundred  $\mu$ l of additional TRIzol was added to the cells and the entire sample was added to a tube containing 250 $\mu$ l of silica-zirconium beads. Tubes were placed in a bead beater homogenizer (BioSpec) for 1 minute and immediately cooled on ice. Samples were incubated at room temperature for 5min and then centrifuged at 12,000g for 5min to remove unhomogenized cell aggregates. Supernatant was transferred to a new tube and 200 $\mu$ l of chloroform was added. After vigorous shaking for 30 seconds followed by 10 min incubation with periodic shaking, samples were centrifuged at 12,000g for 15 min. The upper aqueous layer was added to an equal volume of fresh 70% ethanol and used an input to the Aurum Total RNA Mini Kit (Biorad). RNA was processed according to manufacturer's instructions including on-column DNase digestion. RNA was eluted twice with 30 $\mu$ l of warmed water and the concentration was measured using a nanodrop spectrophotometer.

The qScript cDNA SuperMix (Quantabio) was used to generate a 100ng cDNA library. A 1:10 dilution was used as a template in a 3-step SYBR-green qPCR region with a 57°C annealing temperature. We used a panel of primers targeting cardiomyocyte reference genes (*TNNT2*, *MYBPC3*, *TNNI3*, *SLC8A1*, *MYOZ2* and *GAPDH*) that passed optimization studies confirming primer specificity and efficiency. For enhancer deletion measurements, changes in *MYH6* and *MYH7* expression were calculated using the delta-delta Cq method using the geometric mean expression of cardiomyocyte reference genes.

**SDS-PAGE of Myosin Heavy Chain Isoforms.** We prepared a 6.25% acrylamide/bis-acrylamide(99:1) resolving gel by combining 7.5mL of 25% Acrylamide/bis-acrylamide(99:1), 5.65mL of 2M Tris pH 8.8, 16.55mL of ddH<sub>2</sub>O, 300 $\mu$ l of 10% SDS (w/v), 312 $\mu$ l 10% ammonium persulfate, and 12.5 $\mu$ l of TEMED. The resolving gel was allowed to polymerize for 1 hour at room temperature. A 5% acrylamide/bis-acrylamide (99:1) stacking gel was prepared by combining 2mL of 25% Acrylamide/bis-acrylamide(99:1), 2.5mL of 0.5M Tris pH 6.8, 5.325mL of ddH<sub>2</sub>O, 100 $\mu$ l of 10% SDS (w/v), 90 $\mu$ l 10% ammonium persulfate, and 6 $\mu$ l of TEMED. The stacking gel was allowed to polymerize for 8 hours. Lysates of ~day 20 IPSC-CMs were prepared and protein concentrations were quantified with the Quick-Start Bradford Protein Assay (Bio-Rad). ~7 $\mu$ g of protein was mixed 1:1 with 2x Laemmli Sample Buffer containing  $\beta$ -mercaptoethanol. Samples were loaded into the SDS-polyacrylamide gel described above and separated at 13mA for 20min, and 15mA for 21 hours. After electrophoresis, gels were fixed with a 7% acetic acid/50% methanol solution for 1 hour at room temperature. Protein was visualized with the Sypro Ruby Protein Gel Stain (Thermo Fisher) following manufacturer's instructions. Quantification of band intensities was done using Fiji.<sup>45</sup>

**Flow Cytometry Analysis of IPSC-CM Purity.** At approximately day 20 of differentiation, IPSC-CMs were collected using TrypLE (Thermo Fisher). Cells were resuspended in 1mL of PBS and added to 1mL of 8% PFA in PBS for fixing. Cells were fixed at 37°C for 10min with shaking. Cells were collected by centrifugation at 600g for 5min and resuspended in 100 $\mu$ l ice-cold 90% methanol in PBS per 500,000 starting cells. Cells were stored at -20° C until further processing. On the day of flow, ~1 million cells were aliquoted into two tubes containing 2mL of 0.5mg/mL BSA in PBS and pelleted. One tube was resuspended in 100 $\mu$ l of PBS containing 1:200 dilution of *TNNT2*-Alexa Fluor 694 (BD Pharmingen #565744) and 1:200 *MYBPC3*-Alexa Fluor 488 (Santa Cruz Biotechnology #sc-137180 AF488) and the other tube was suspended in PBS alone. Cells were stained for 1 hour at room temperature. Four mL of 0.5mg/mL BSA in PBS was added to each tube and cells were pelleted. Cells were resuspended in 100 $\mu$ l in PBS

and analyzed on a flow cytometer. The percentage of TNNT2-positive cells was determined by using PBS only as a negative control.

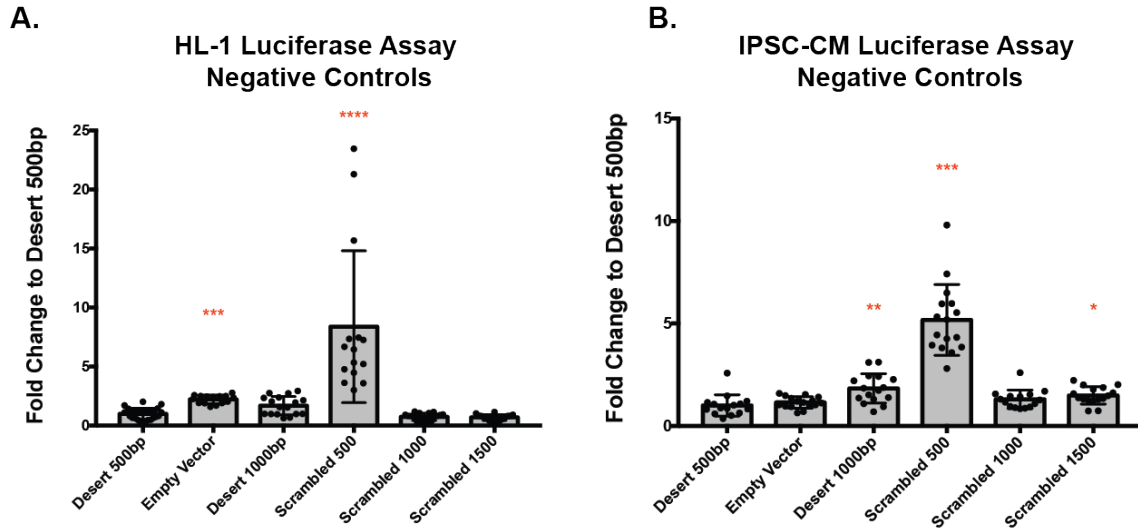

**Figure I. Negative control region reporter assay activity in HL-1 cells and IPSC-CMs.** HL-1 cells are a mouse atrial cell line<sup>10</sup>. Expression of *MYH6/7* differs between atrial and ventricles and between mouse and human ventricles<sup>54</sup>. **A.** Luciferase assay using HL-1 cells including multiple negative control regions. Average n=18 across three different days. **B.** Luciferase assay data for multiple negative control regions in IPSC-CMs. Average n=16 across two differentiations. Desert represents genomic regions with little or no evidence of enhancer function in left ventricle tissue. Scrambled represents randomly selected nucleotides. Significance vs desert 500bp determined by nonparametric one-way ANOVA with Dunn's multiple comparisons correction. \*<0.03, \*\*<0.0021, \*\*\*<0.0002, \*\*\*\*<0.0001.

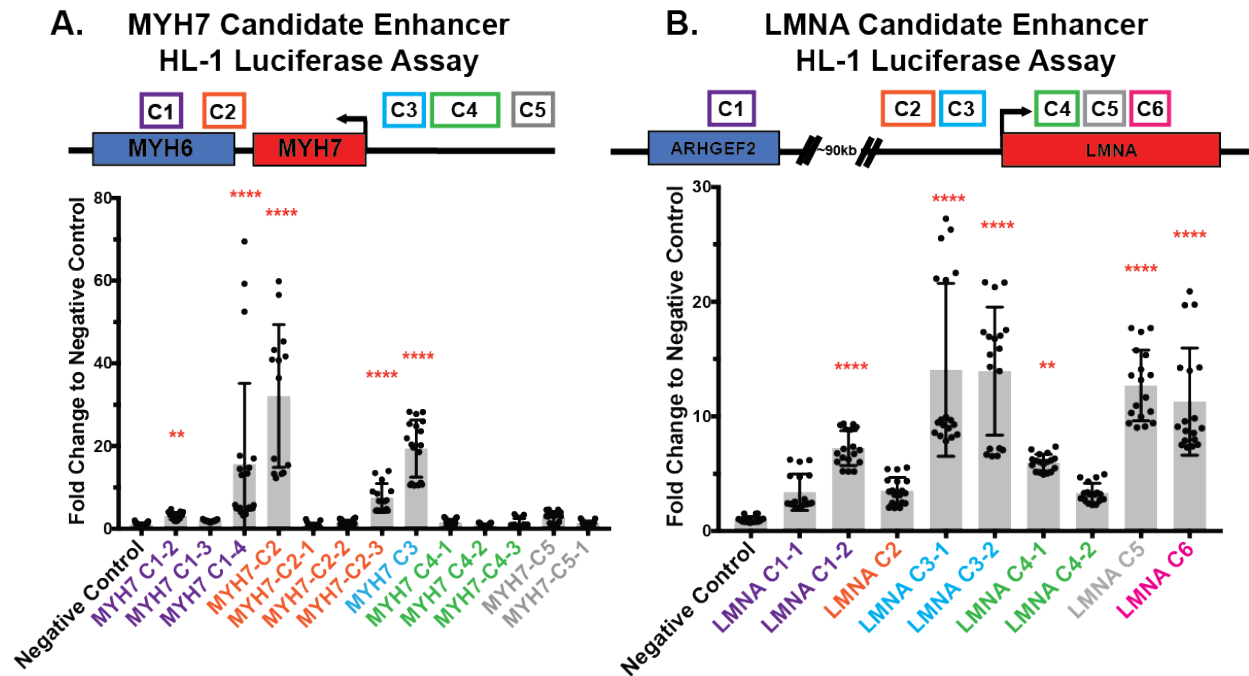

**Figure II. Reporter assay for candidate enhancer regions of *MYH7* and *LMNA* in HL-1 cells.** **A.** Above, color-coded schematic of candidate *MYH7* enhancers identified in figure 1. Below, data from luciferase reporter assay in HL-1s for full and partial candidate enhancer regions. **B.** Above, color-coded schematic of candidate *LMNA* enhancers identified in figure 1. Below, data from luciferase reporter assay in HL-1s for full and partial candidate enhancer regions. Data displayed as fold change to negative control genomic 500bp desert region with mean  $\pm$  SD. Average  $n=17$  across three separate days. Significance vs negative control determined by nonparametric one-way ANOVA with Dunn's multiple comparisons correction,  $** < 0.0021$ ,  $**** < 0.0001$ .

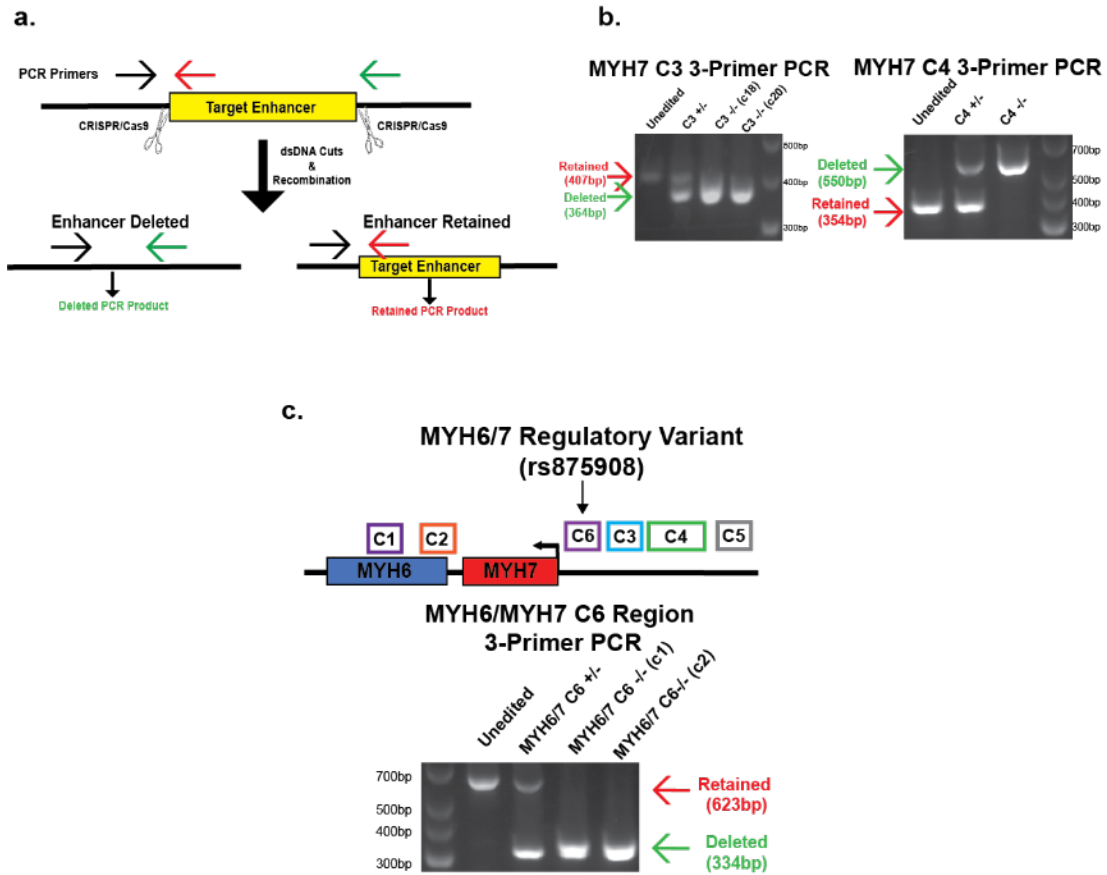

**Figure III. CRISPr-Cas9 enhancer deletion strategy successfully removes *MYH7* enhancer regions.** **A.** Schematic of CRISPr-Cas9 deletion strategy and PCR primers used for genotyping. **B.** Agarose gels of 3-primer PCRs on genomic DNA from iPSCs treated with guides targeting *MYH7* candidate enhancers 3 and 4 demonstrating successful knockout. **C.** Top, schematic representation of the location of the MYH6/7 regulatory variant. Bottom, agarose gel of 3-primer PCR on genomic DNA from iPSCs treated with guides targeting the region overlapping the MYH6/7 regulatory variant showing successful deletion.

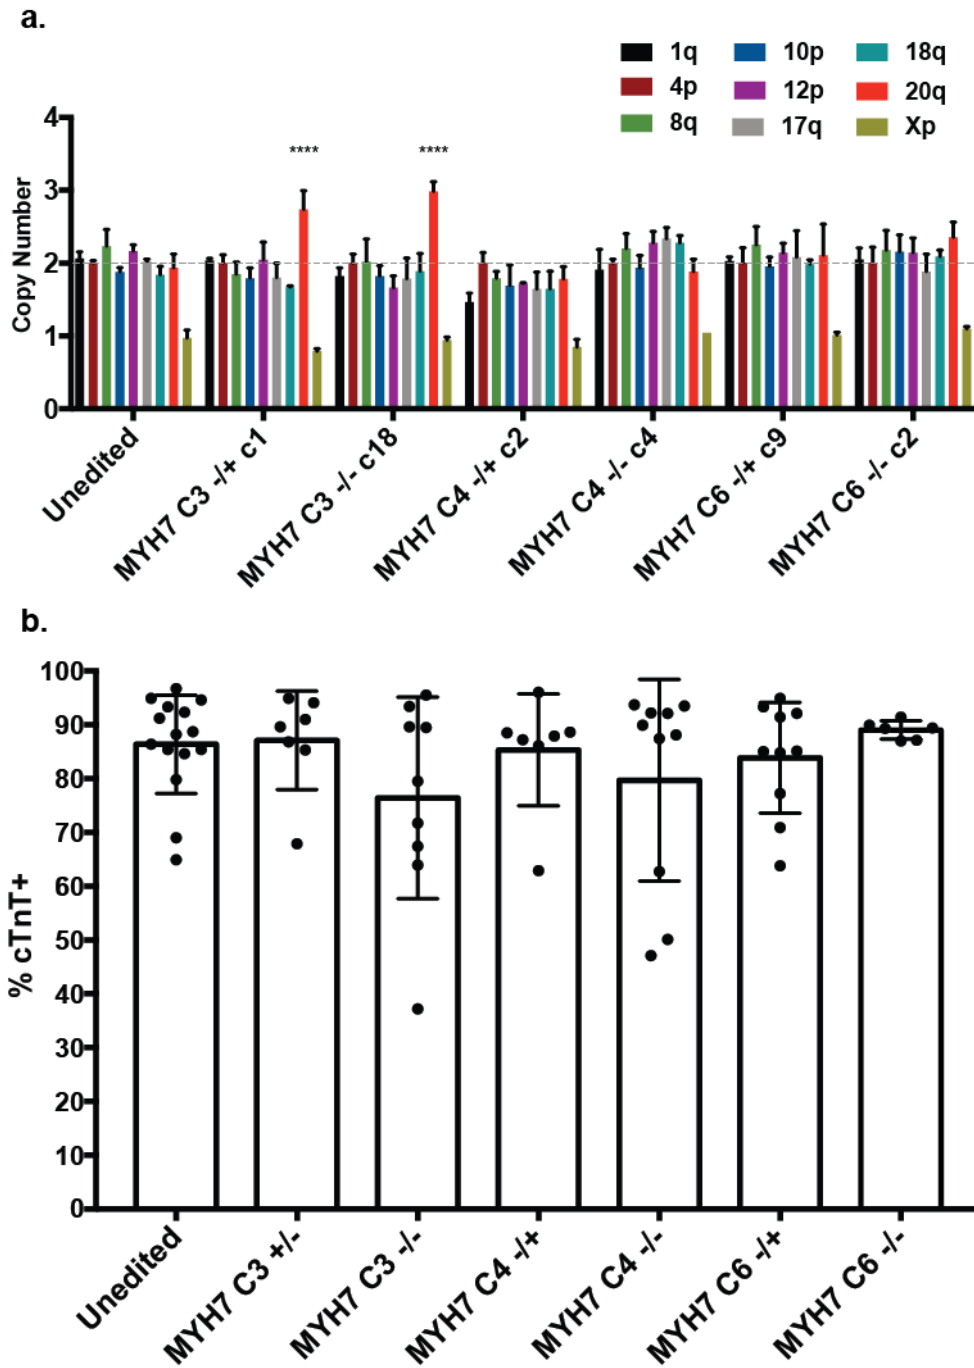

**Figure IV. Validation of gene edited iPSCs and iPSC-CMs.** Nonhomologous end joining CRISPr-Cas9 was used to generate guided deletions in iPSCs. Resulting clones were treated isolated analyzed for common chromosomal rearrangements. **A.** Results from the hPSC genetic analysis test kit (Stem Cell Technologies) assaying common chromosomal rearrangements in CRISPr treated iPSCs. **B.** iPSC-CM purity measurements evaluating the percent cardiac troponin T (cTnT) cells across different enhancer deletion lines. cTnT, cardiac troponin T. No significant differences were found between unedited and CRISPr treated cells by one-way ANOVA.



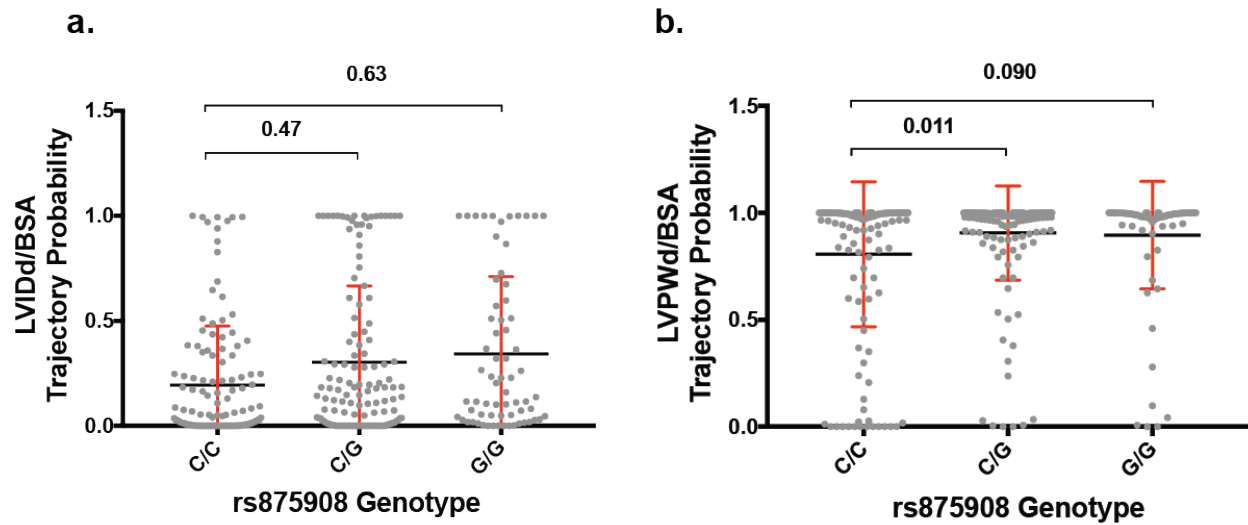

**Figure V. Phenotypic regressions using the NU genomes cohort. A.** Association of variant status with LVIDd/BSA over time in the NU genomes cohort (n=387). **B.** Association of variant genotype with LVPWd/BSA overtime in the NU genomes cohort. Significance determined using a linear regression model corrected for race and sex. LVIDd/BSA, left ventricular internal diameter during diastole corrected for body surface area. LVPWd/BSA, left ventricular posterior wall thickness during diastole corrected for body surface area.

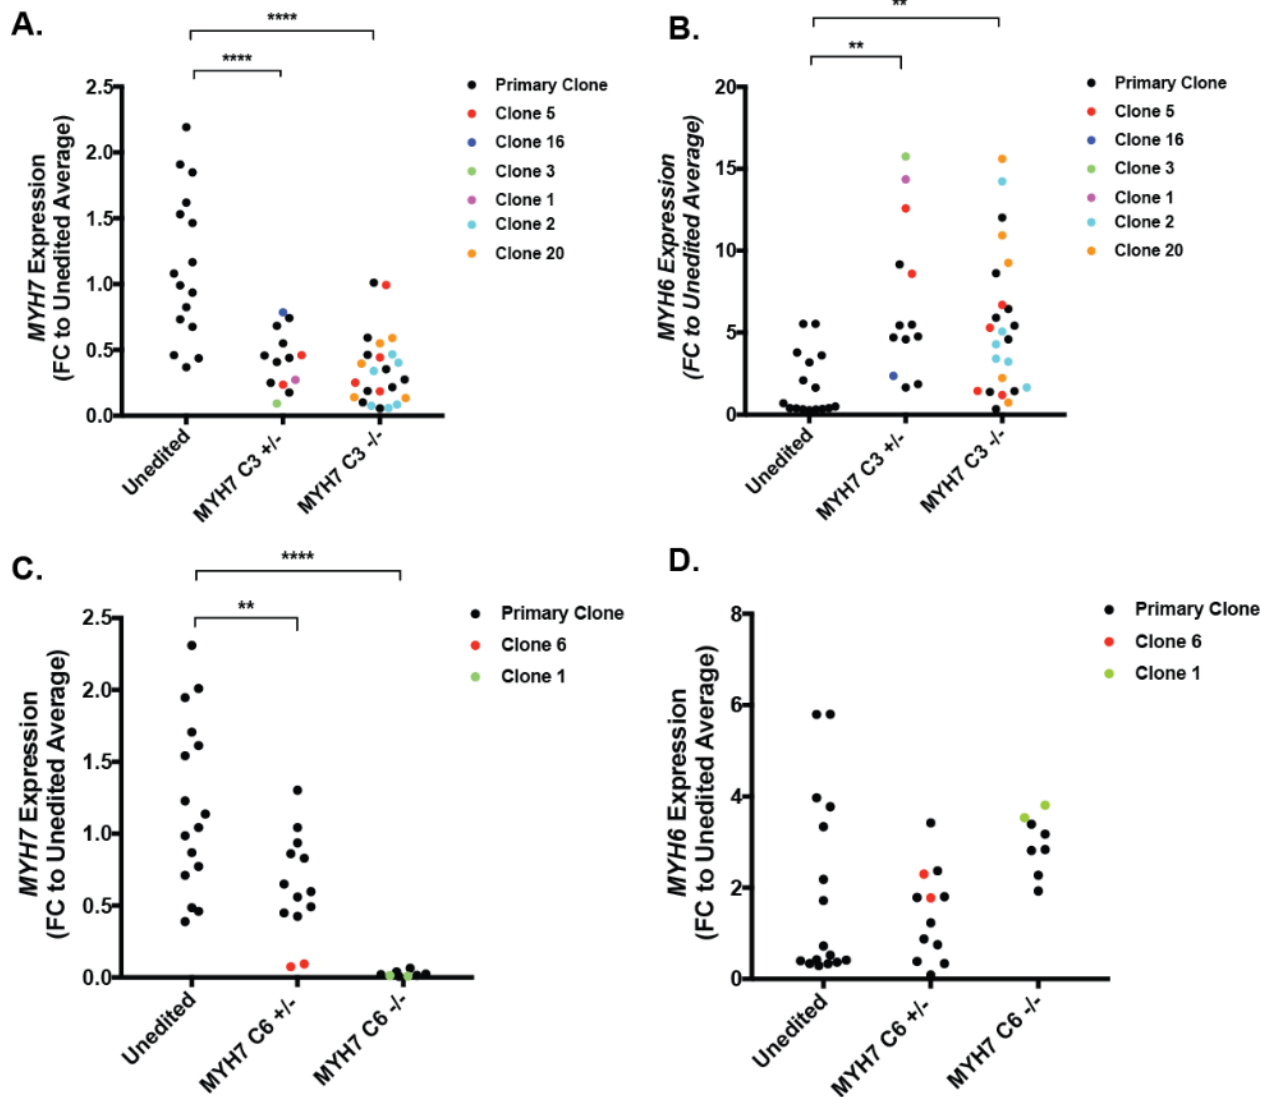

**Figure VI. Deletion of the MYH7-C3 and MYH7-C6 enhancer affects *MYH7* and *MYH6* expression levels across multiple clones.** **A.** Reduction of *MYH7* mRNA expression in *MYH7*-C3-deleted cells was observed across multiple independent clones. **B.** Increase of *MYH6* expression in *MYH7*-C3-deleted cells was observed across multiple independent clones. **C.** Reduction of *MYH7* mRNA expression in *MYH7*-C6-deleted cells was observed across multiple clones. **D.** Changes in *MYH6* mRNA expression in *MYH7*-C6-deleted cells are consistent across multiple independent clones. All data shown as mean  $\pm$ SD. \* determined by one-way ANOVA with Dunnett's multiple comparisons test. \*\*<0.0021, \*\*\*\*<0.0001.

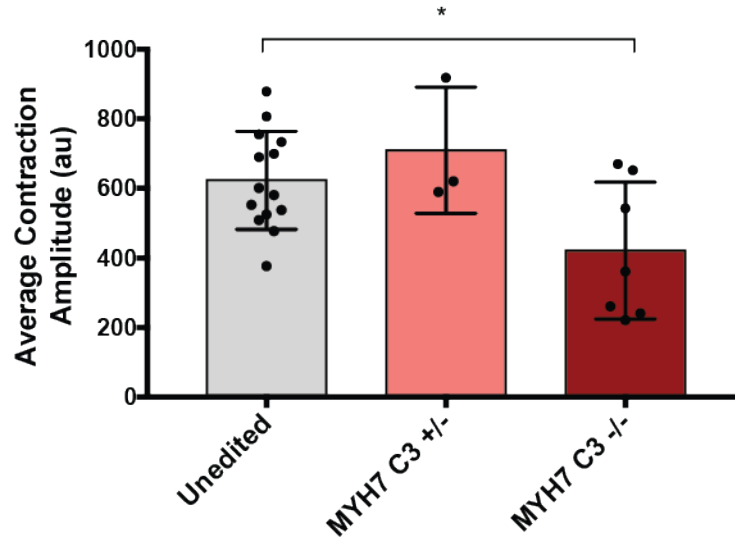

**Figure VII. Deletion of the *MYH7-C3* enhancer produces hyperdynamic function in engineered heart tissues.** Average contraction amplitude measurements of EHT contractions containing unedited or *MYH7-C3* deleted cells showed a decrease in contraction amplitude in *MYH7-C3* deleted EHTs. Each point represents the average time to peak measurement of a single EHT across multiple contractions (unedited n=14, *MYH7 C3*<sup>+/-</sup> n=3, *MYH7 C3*<sup>-/-</sup> n=7.) All data shown as mean  $\pm$ SD. \* determined by one-way ANOVA with Dunnett's multiple comparisons correction. \* $<0.03$ .

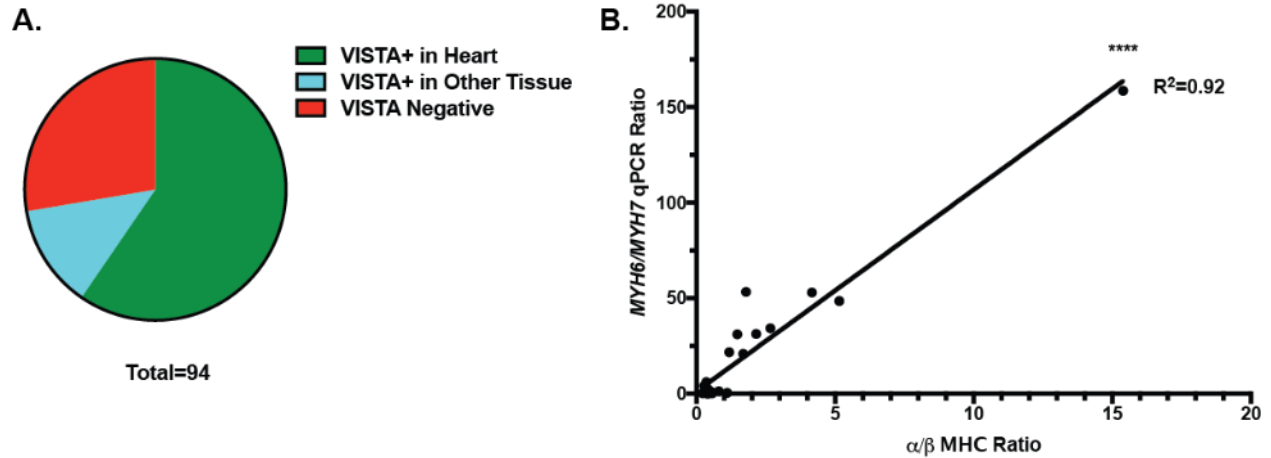

**Figure VIII. Regulatory Variant VISTA Overlap and myosin heavy chain RNA and protein level correlations.** **A.** Overlap between variants identified by our pipeline and the enhancer regions tested in the VISTA database. **B.** Regression between the *MYH6/MYH7* ratio determined by qPCR and the  $\alpha/\beta$  MHC ratio determined by SDS-PAGE. Significance determined by linear regression. \*\*\*\* <0.0001.

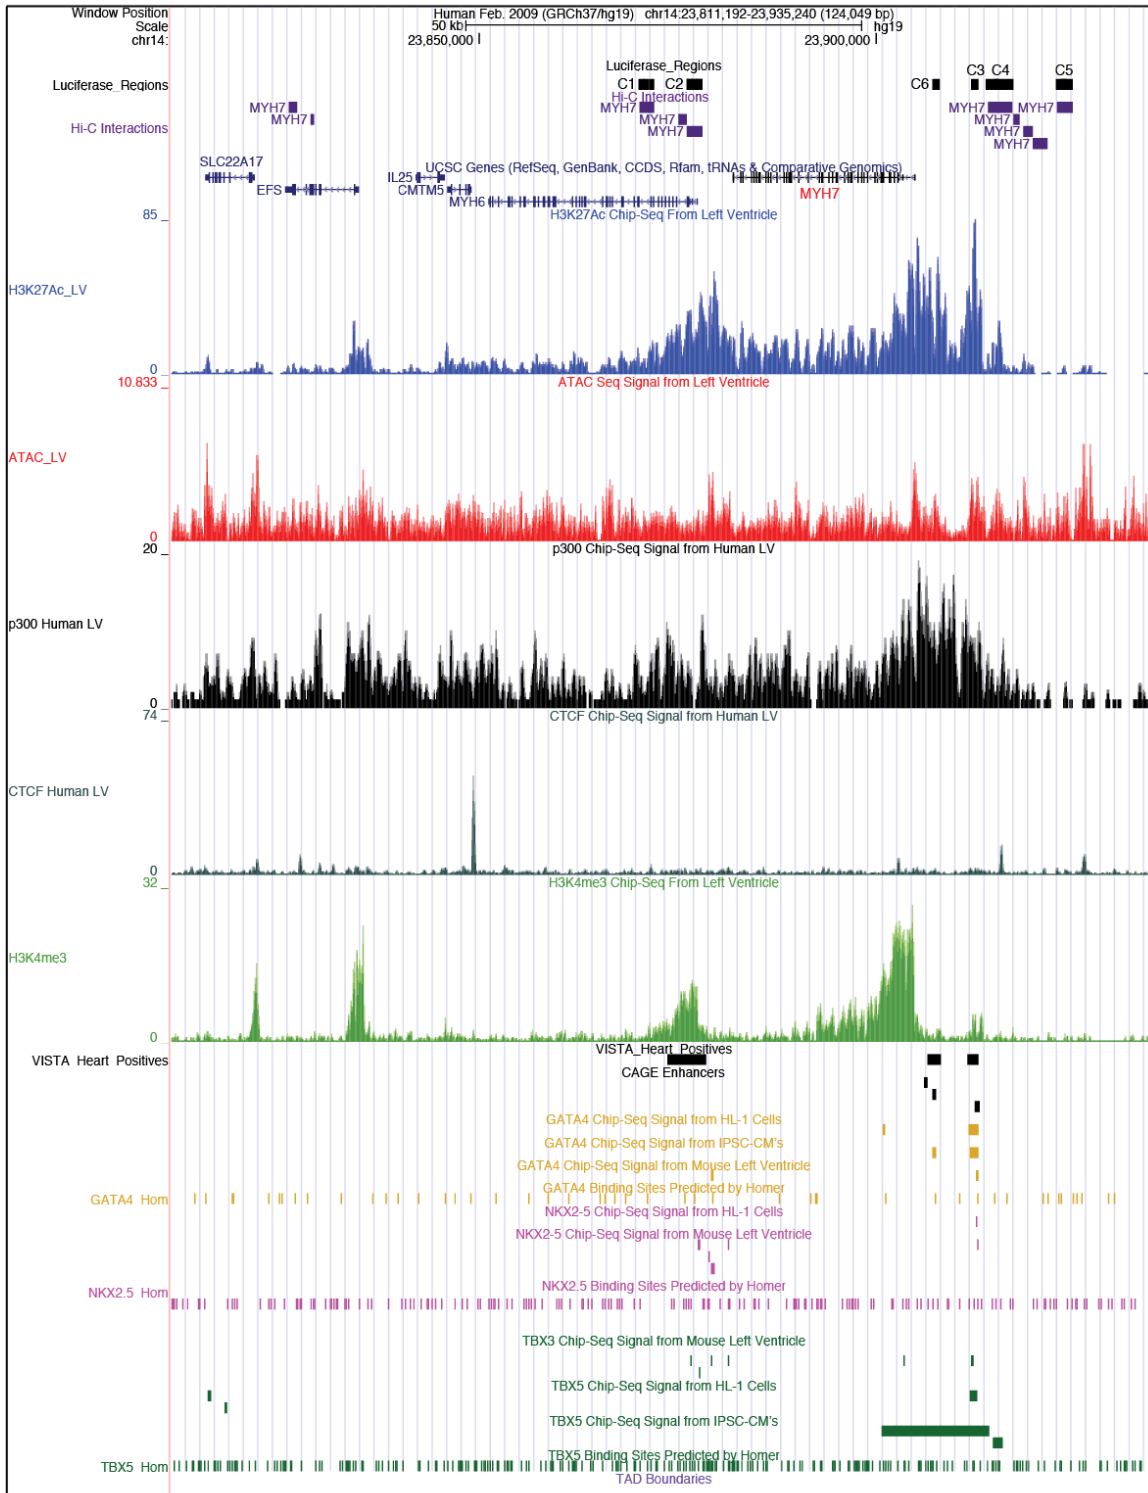

Figure IX. Full map of putative *MYH7* Enhancers.

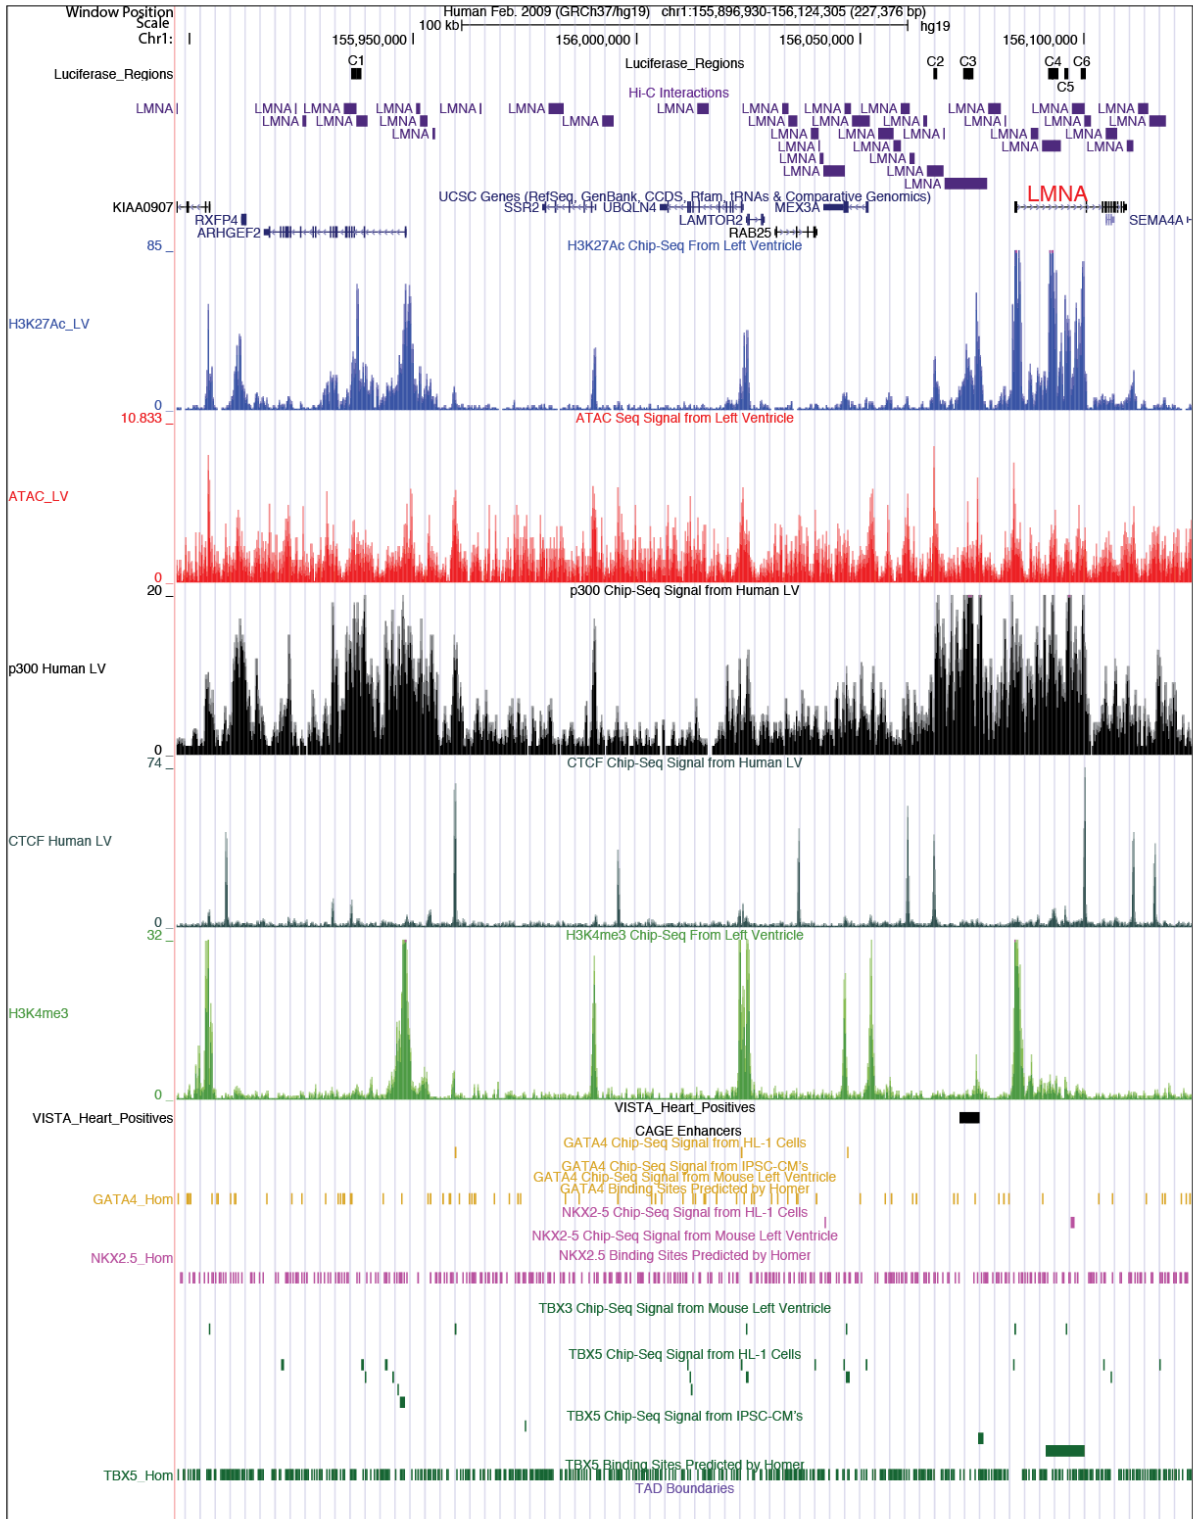

Figure X. Full map of putative *LMNA* Enhancers.

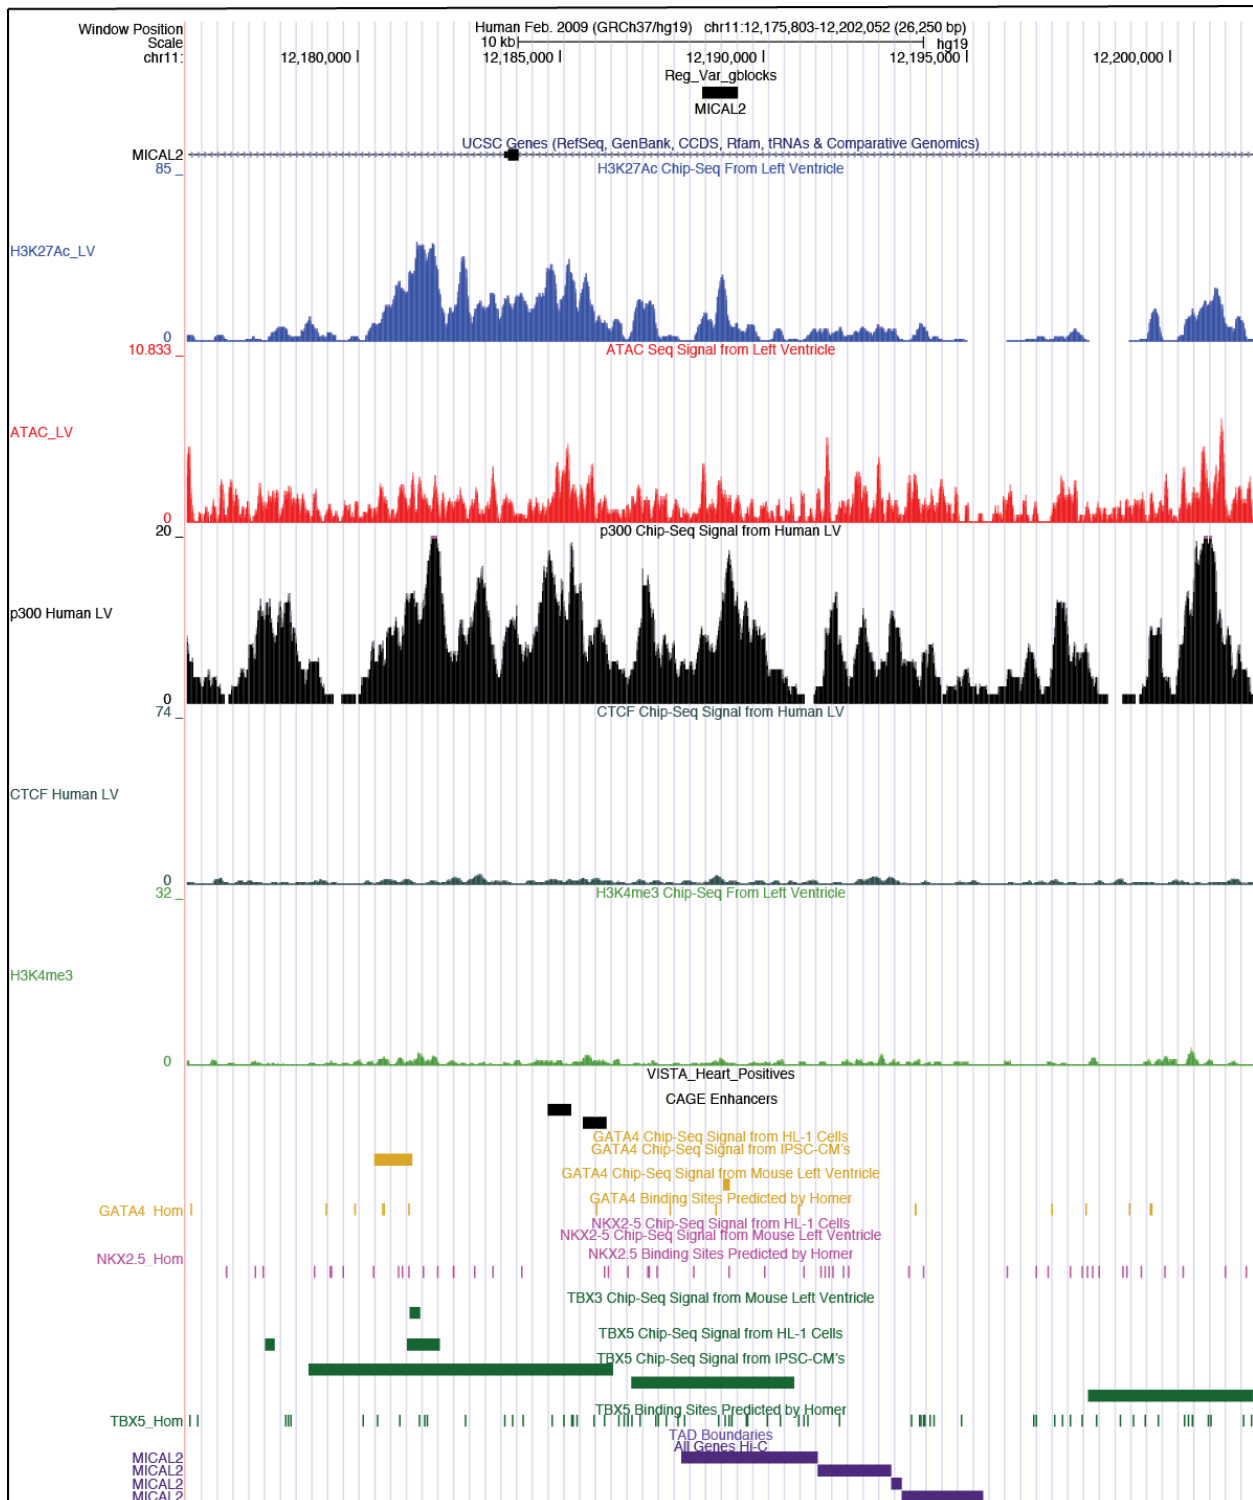

Figure XI. Full map of *MICAL2* Regulatory Variant.

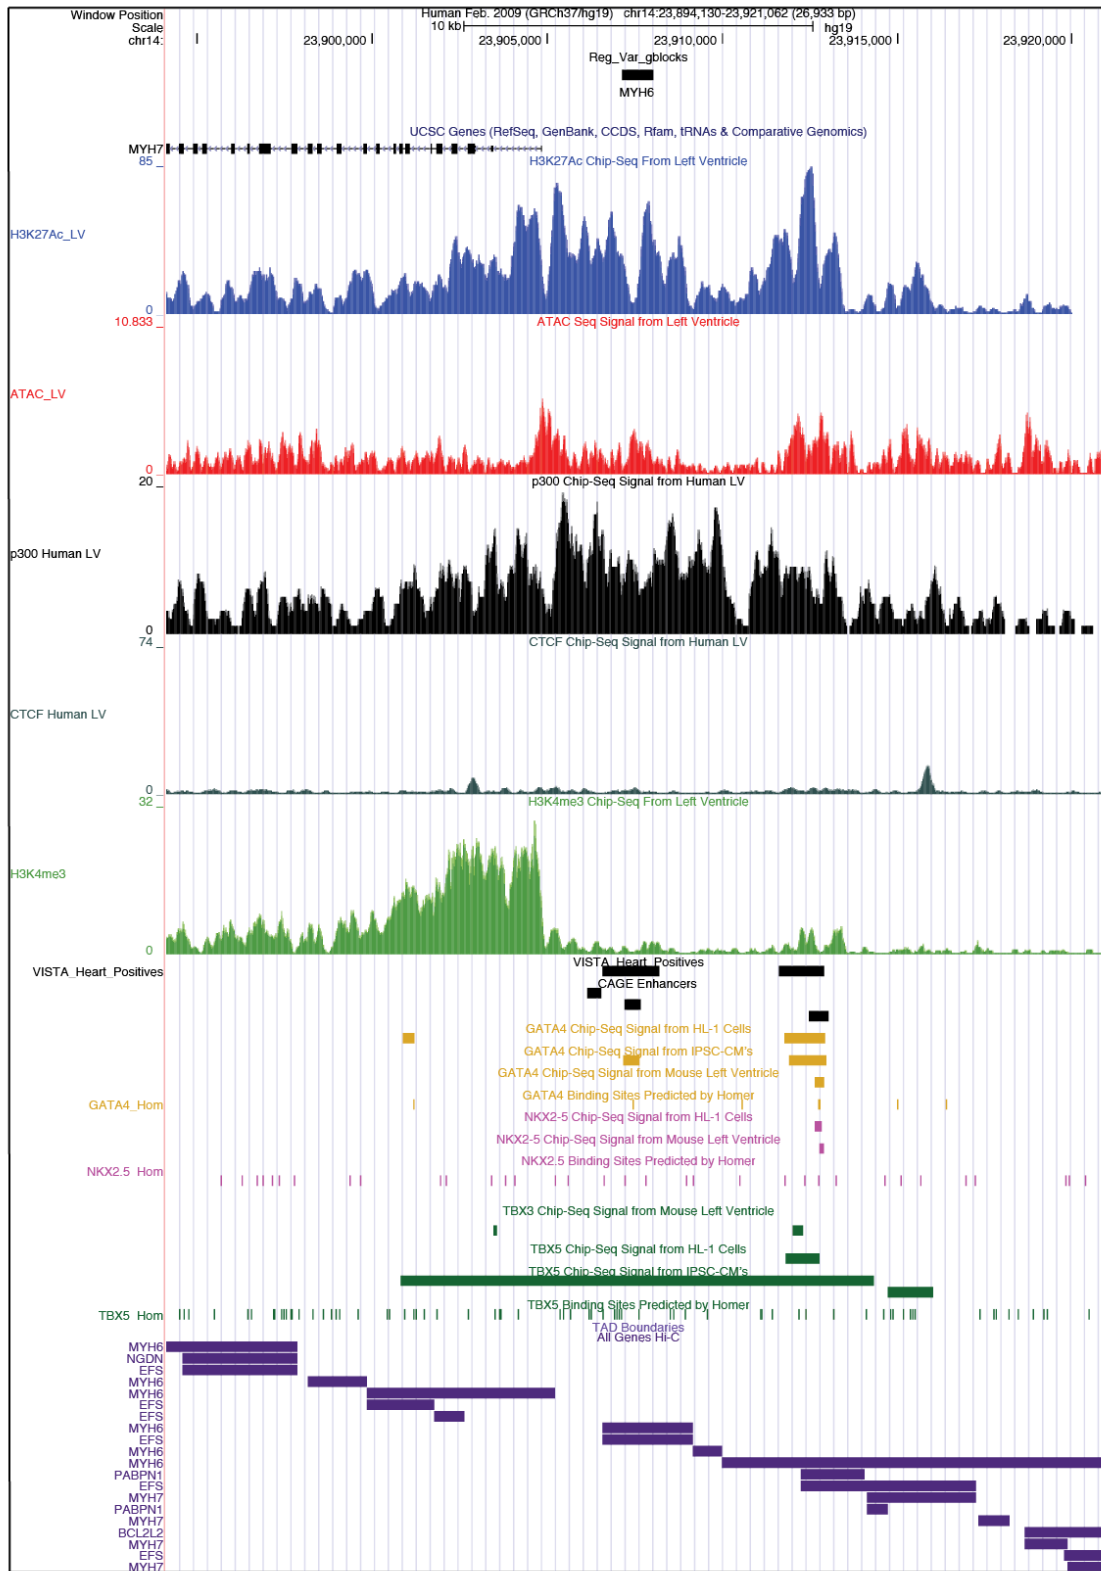

Figure XII. Full map of *MYH6/7* Regulatory Variant





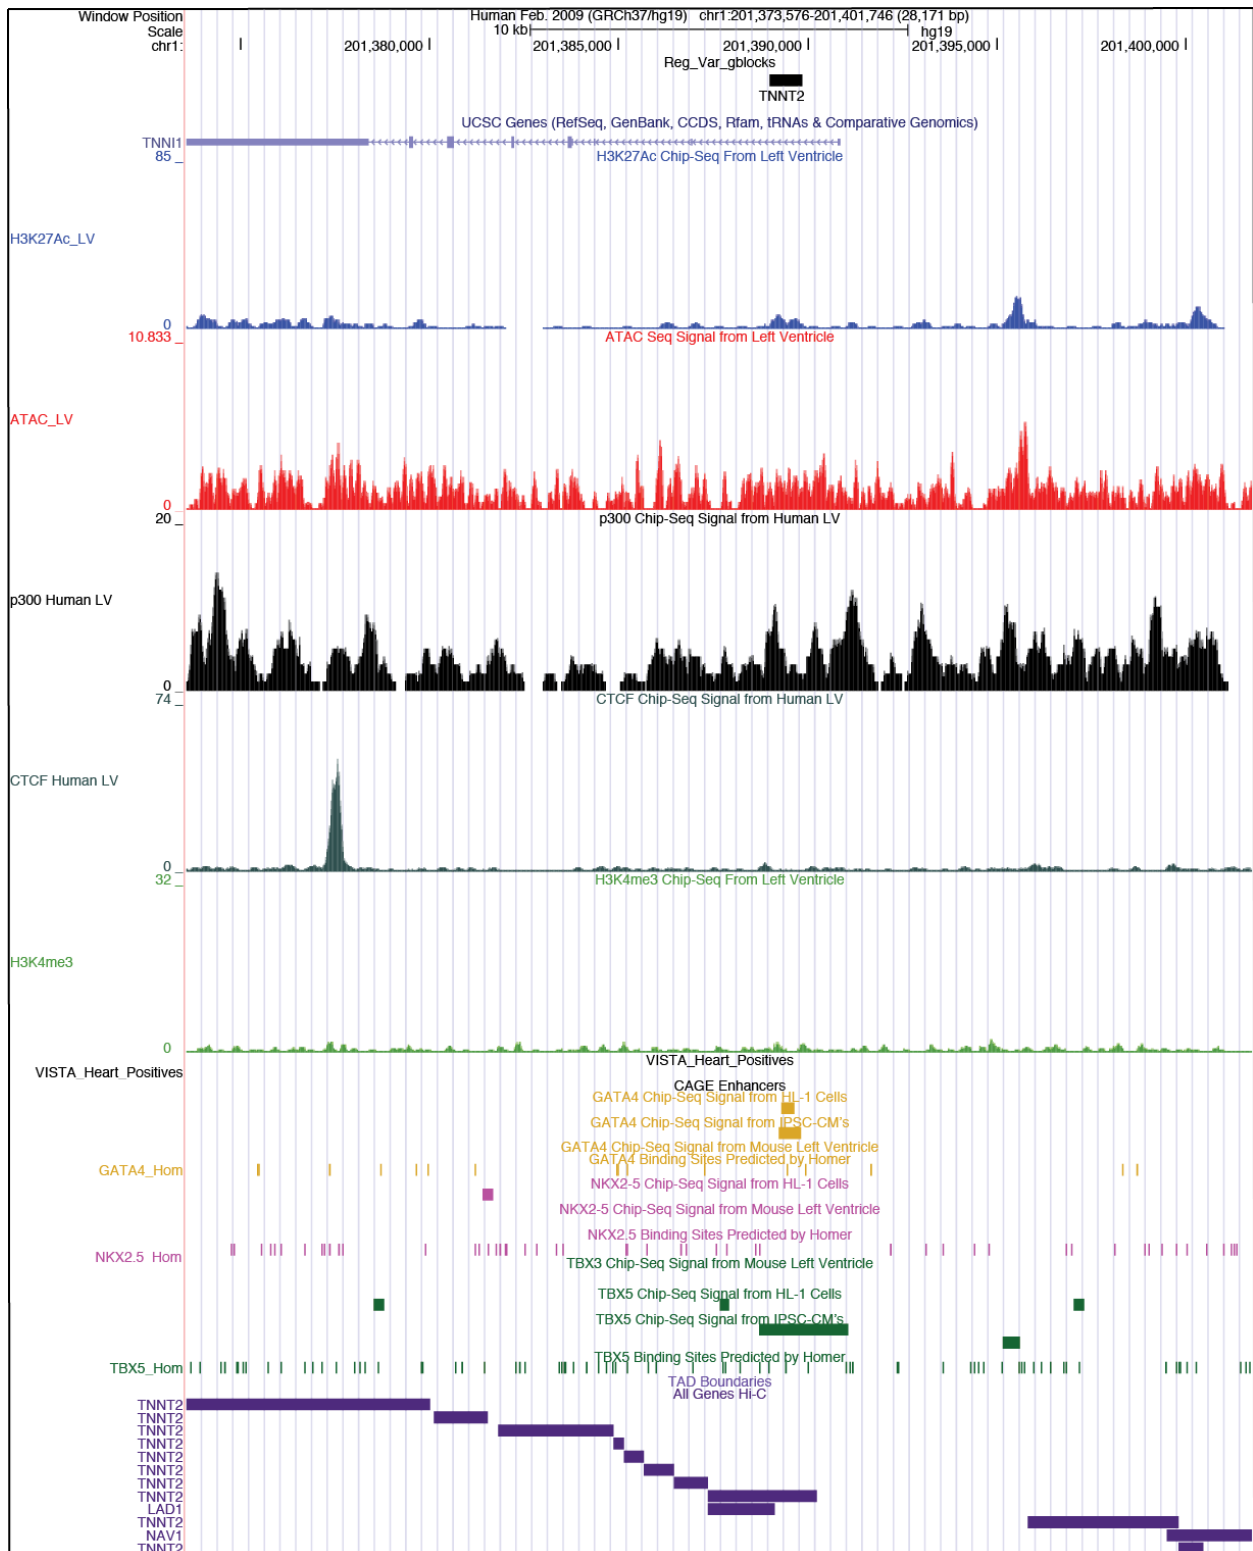

Figure XIV. Full map of *TNNT2* Regulatory Variant.

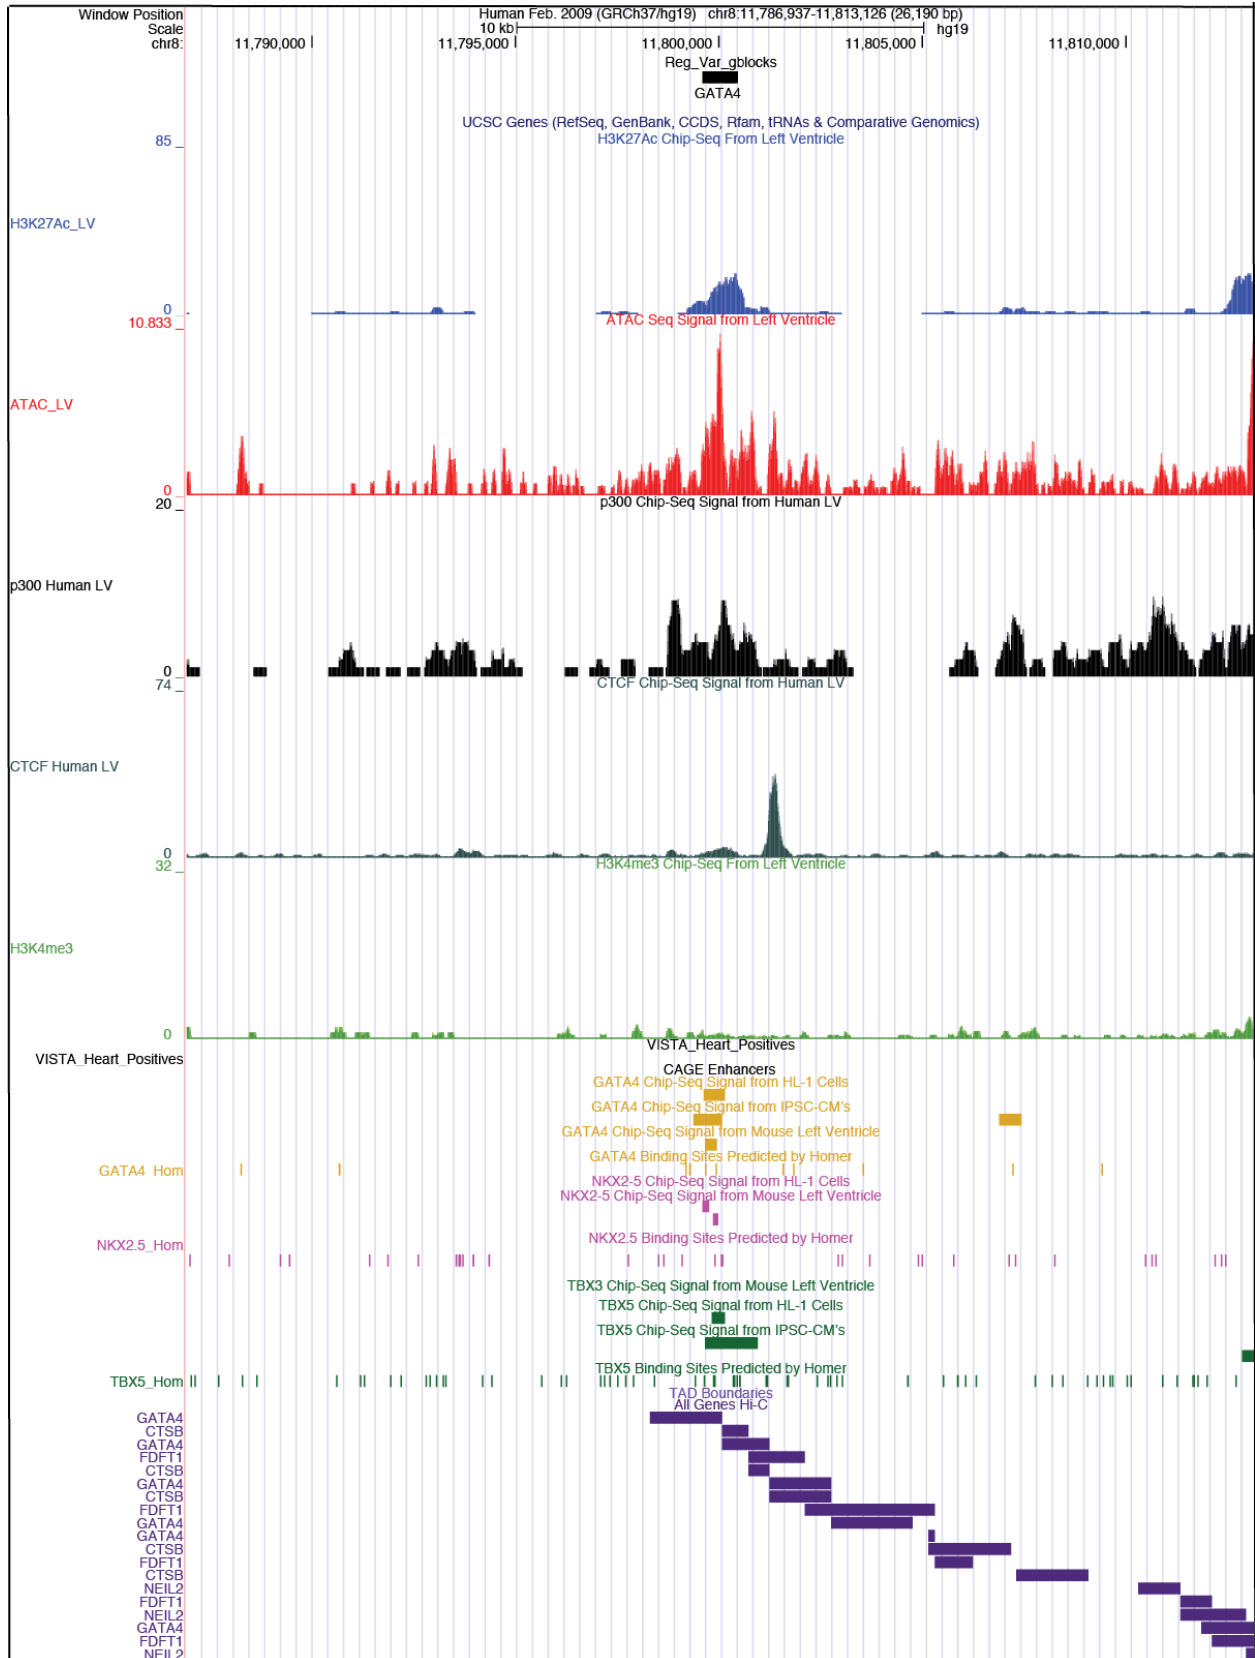

Figure XV. Full map of *GATA4* Regulatory Variant.

**Table I. Datasets used for epigenomic identification of candidate enhancers**

| <b>Target</b>                            | <b>Dataset</b>                                  | <b>Accession Number</b> | <b>Reference</b>                                          |
|------------------------------------------|-------------------------------------------------|-------------------------|-----------------------------------------------------------|
| H3K27Ac<br>Histone<br>Modification       | Human LV- ChiP-Seq                              | ENCSR150QXE             | Roadmap Epigenomics Consortium, et al. 2015 <sup>46</sup> |
| H3K4me3<br>Histone<br>Modifications      | Human LV- ChiP-Seq                              | ENCFF045RCM             | Roadmap Epigenomics Consortium, et al. 2015 <sup>46</sup> |
| Open Chromatin                           | Human LV-ATAC-Seq                               | ENCFF148ZMS             | ENCODE Project. 2018 <sup>47</sup>                        |
|                                          | IPSC-CM- ATAC-Seq                               | GSE85330                | Liu, Q. et al. 2017 <sup>48</sup>                         |
| p300                                     | Human LV- ChiP-Seq                              | GSE32587                | May, D. et al. 2012 <sup>49</sup>                         |
| CTCF                                     | Human LV- ChiP-Seq                              | ENCFF482ZNO             | ENCODE Project. 2018 <sup>47</sup>                        |
| Promoter Interactions                    | IPSC-CM Promoter-Capture Hi-C                   | E-MTAB-6014             | Montefiori, L. et al. 2018 <sup>19</sup>                  |
| TAD Boundaries                           | Human LV- Hi-C                                  | GSE58752                | Leung, D. et al. 2015 <sup>21</sup>                       |
| GATA4 Binding Sites                      | IPSC-CM-ChIP-Seq                                | GSM2280004              | Ang, Y. et al. 2016 <sup>50</sup>                         |
|                                          | HL-1- ChIP-Seq                                  | GSM558904               | He, A. et al. 2011                                        |
|                                          | Mouse LV- ChIP-Seq                              | GSM862697               | van den Boogaard, M. et al. 2012 <sup>51</sup>            |
|                                          | Computational Predictions                       | HOMER                   | Heinz, S. et al. 2010 <sup>16</sup>                       |
| TBX5/3 Binding Sites                     | IPSC-CM-ChIP-Seq                                | GSM2280011              | Ang, Y. et al. 2016 <sup>50</sup>                         |
|                                          | HL-1- ChIP-Seq                                  | GSM558908               | He, A. et al. 2011 <sup>52</sup>                          |
|                                          | Mouse LV- ChIP-Seq                              | GSM862695               | van den Boogaard, M. et al. 2012 <sup>51</sup>            |
|                                          | Computational Predictions                       | HOMER                   | Heinz, S. et al. 2010 <sup>16</sup>                       |
| NKX2.5 Binding Sites                     | HL-1- ChIP-Seq                                  | GSM558906               | He, A. et al. 2011 <sup>52</sup>                          |
|                                          | Mouse LV- ChIP-Seq                              | GSM862698               | van den Boogaard, M. et al. 2012 <sup>51</sup>            |
|                                          | Computational Predictions                       | HOMER                   | Heinz, S. et al. 2010 <sup>16</sup>                       |
| eRNA Expression                          | Human LV-CAGE-Seq                               | GSE147236               | Gacita, A. et al. 2020 <sup>53</sup>                      |
| Experimentally Validated Heart Enhancers | Reporter Expression in Transgenic Mouse Embryos | VISTA Enhancer Browser  | Visel, A. Et al. 2007 <sup>22</sup>                       |

**Table II. Luciferase constructs tested in iPSC-CMs and HL-1 cells**

| Region Name | Primers                                              | Size (bp) | Coordinates (hg19)           | Distance to TSS (bp) |
|-------------|------------------------------------------------------|-----------|------------------------------|----------------------|
| MYH7-C1-2   | AGTTCAGCCCCATGAGGTAG<br>GGTACCGAGGCGAGGGATATGGTGAAGG | 673       | chr14:23870150-<br>23870823  | 34,047               |
| MYH7-C1-3   | GGGTCAGGTCTTTCACAAGC<br>TTTTCTCCTGTGCCCAAGAC         | 698       | chr14:23870761-<br>23871458  | 33,412               |
| MYH7-C1-4   | TCTTGGGCACAGGAGGAAAATTC<br>TCCCTTCCTCCATTCACCC       | 697       | chr14:23871436-<br>23872136  | 32,734               |
| MYH7-C2     | CTGGCCTTGGCTTTTCTCCAG<br>CAAACCAGGGTGGCCTCAAG        | 2072      | chr14:23876121-<br>23878188  | 26,682               |
| MYH7-C2-1   | AAACCTCCTTTACCTGGGC<br>TTGGGAACAGAAGGAGACC           | 694       | chr14:23877446-<br>23878141  | 26,729               |
| MYH7-C2-2   | GCCCTACTCACCTTCCATTC<br>TGCTCTCTGCTTCTAACCC          | 838       | chr14:23876221-<br>23877058  | 27,812               |
| MYH7-C2-3   | ACCTGGTTATCCCTTCACGG<br>TGTCACCTCCAGAGCCAAAGG        | 844       | chr14:23876782-<br>23877626  | 27,244               |
| MYH7-C3     | GBLOCK                                               | 961       | chr14:23912000-<br>23912961  | -7,130               |
| MYH7-C4-1   | TGTTACAATCCCATCCCCA<br>AGTGGGTCTCTGAAAAGGCA          | 1400      | chr14:23913940-<br>23915344  | -9,070               |
| MYH7-C4-2   | TGGCTGGATTCCTGATGTG<br>CGGACTTTGCCCTTCATAGCACC       | 2209      | chr14:23915187-<br>23917391  | -10,317              |
| MYH7-C5     | GCCAGAGGCTGAGCGTGAATTAG<br>GCAATTTGAATATGATATGCCCAGG | 2223      | chr14:23922666-<br>23924886  | -17,796              |
| MYH7-C5-1   | GBLOCK                                               | 790       | chr14:23923381-<br>23924171  | -18,511              |
| LMNA-C1-1   | CCTGTCCTGGAGTGGCTAAATC<br>GGGCAGGGGTTAGAATTCCTG      | 1156      | chr1:155937201-<br>155938359 | -146,102             |
| LMNA-C1-2   | CATTCGGACTCTCTCCCC<br>TTTAGCCACTCCAGGACAGG           | 1210      | chr1:155936009-<br>155937220 | -147,241             |
| LMNA-C2     | GTTAGGTGCCGGGTTTTCTG<br>TGATATGTGCATGTACGGCG         | 928       | chr14:23904382-<br>23905597  | -17,195              |
| LMNA-C3-1   | CTCTCTCGTCCATCCTCCAC<br>GCTCCTCTTCGGGTCTTCAAAG       | 1108      | chr1:156074366-<br>156075480 | -8,981               |
| LMNA-C3-2   | ACTCCTCTAACAGCTGTGGG<br>CCCCTTGGTGAATGGATCCA         | 1199      | chr1:156073216-<br>156074415 | -10,046              |
| LMNA-C4-1   | GAAAGGGATTGGAGCGGAAAG<br>CAGCAGCCCCTTAACTCTC         | 1211      | chr1:156092084-<br>156093294 | 7,623                |
| LMNA-C4-2   | TAACTGCCACCTTCTGC<br>TTGGCTAGTCTGTGGGTCTG            | 1392      | chr1:156093103-<br>156094494 | 8,642                |
| LMNA-C5     | TGAGATCACCTGGGCGAC<br>AGAAGGGCTGGGCATCCTG            | 850       | chr1:156095724-<br>156096574 | 11,263               |
| LMNA-C6     | CCAGAAAAGGTGAGGGAGGTG<br>GGGAGGGCCTAGGTAGAAGAG       | 1101      | chr1:156099538-<br>156100640 | 15,077               |

**Negative distances refer to upstream the transcriptional start site (TSS) and positive distances are downstream.**

**Table III. qPCR Primers and CRISPR Guides Used in this Study**

| <b>Name</b>                   | <b>Sequence(s)</b>                                                         | <b>Experiments/Notes</b>                         |
|-------------------------------|----------------------------------------------------------------------------|--------------------------------------------------|
| MYH7_C3_KO_G1                 | GCCTAGAAGTCCGGACACCG                                                       | Guide used to remove C3 Enhancer                 |
| MYH7_C3_KO_G2                 | GTGGTGTGGAACAAAGCGAA                                                       | Guide used to remove C3 Enhancer                 |
| MYH7_C3_KO_Homo_G1            | CCTAGAAGTCCGGACAACCG                                                       | Guide used to remove C3 Enhancer in het. iPSCs   |
| MYH7_C3_KO_Homo_G2            | TGGTGTGGAACAAAGCCGAA                                                       | Guide used to remove C3 Enhancer in het. iPSCs   |
| MYH7_C4_KO_G1                 | ATGGGATTGTGAACAGCGGA                                                       | Guide used to remove C4 Enhancer                 |
| MYH7_C4_KO_G2                 | CGTGATTTGGACTGGCGATC                                                       | Guide used to remove C4 Enhancer                 |
| MYH7_C6_KO_G1                 | CAGAGCCTCCCAAACCCGAA                                                       | Guide used to remove C6 Enhancer                 |
| MYH7_C6_KO_G2                 | TTTGTGGGGAGTGACCGGTC                                                       | Guide used to remove C6 Enhancer                 |
| MYH7_C6_KO_Homo_G1            | CAGAGCCTCCCAAACCCGAA                                                       | Guide used to remove C4 Enhancer in het. iPSCs   |
| MYH7_C3_3PrimerGenotyping_Mix | 1.AAGACAGTGGAGTGACGAGG<br>2.AAAGACCTCTAGTGCACCCC<br>3.AGAAGAGAACGAAGCGGGAA | Primers used for genotyping C3 enhancer KO iPSCs |
| MYH7_C4_3PrimerGenotyping_Mix | 1.GAGAGGGTGGAGGAGGGT<br>2.TGCATTCCAGGCTGAGTGA<br>3.CCCCTTGGTACTGTCCTCAC    | Primers used for genotyping C4 enhancer KO iPSCs |
| MYH7_C6_3PrimerGenotyping_Mix | AAAGGGTGCTTGGGACGTAG<br>CCTCACTCTCCCCACAAGG<br>GCCTGAGTAGCCCTGGAAA         | Primers used for genotyping C6 enhancer KO iPSCs |
| hsMYH7_qPCR                   | F.GCAGCTAAAGGTCAAGGCC<br>R.AGCTACTCCTCATTCAAGCC                            | Gene expression in iPSC-CMs<br>Efficiency= 1.04  |
| hsMYH6_qPCR                   | F.AAGTCCTCCCTCAAGCTCATGGC<br>R.ATTTTCCCGGTGGAGAGC                          | Gene expression in iPSC-CMs<br>Efficiency= 0.96  |
| hsTNNT2_qPCR                  | F.AGGAGACCAGGGCAGAAGATG<br>R.CTGGGCTTTGGTTGGACTCC                          | Gene expression in iPSC-CMs<br>Efficiency=0.98   |
| hsMYBPC3_qPCR                 | F.CCCCATCTGAGTACGAGCG<br>R.AGCCAGTTCACGGTCAG                               | Gene expression in iPSC-CMs<br>Efficiency= 0.95  |
| hsSLC8A1_qPCR                 | F.AGTGCTGGGGAAGATGATGACGACG<br>R.AGGATGGAGACAATGAAACACGCC                  | Gene expression in iPSC-CMs<br>Efficiency= 1.02  |
| hsTNNI3_qPCR                  | F.CGTGTGGACAAGGTGGATGA<br>R.CCGCTTAAACTTGCCTCGAA                           | Gene expression in iPSC-CMs<br>Efficiency=1.06   |
| hsMYOZ2_qPCR                  | F.AACACCCAGATCCACGAAG<br>R.GCCTCTAAAAGCTCCGGATC                            | Gene expression in iPSC-CMs<br>Efficiency=1.02   |
| hsGAPDH_qPCR                  | F.GTGGACCTGACCTGCCGTCT<br>R.GGAGGAGTGGGTGTCGCTGT                           | Gene expression in iPSC-CMs<br>Efficiency= 0.96  |

**Table IV. Genotypes of enhancer deleted cells as determined by Sanger sequencing.**

| Target  | Clone | Genotype Call | Allele 1         |                  | Allele 2        |                 |
|---------|-------|---------------|------------------|------------------|-----------------|-----------------|
|         |       |               | Guide 1 Site     | Guide 2 Site     | Guide 1 Site    | Guide 2 Site    |
| MYH7 C3 | 1     | Heterozygous  | WT +1 (T)        | WT +1 (C)        | Deletion +0     | Deletion +0     |
| MYH7 C3 | 18    | Homozygous    | Deletion +2 (CT) | Deletion +2 (CT) | Deletion -1 (T) | Deletion -1 (T) |
| MYH7 C4 | 2     | Heterozygous  | WT +1 (G)        | WT +0            | Deletion -6     | Deletion -3     |
| MYH7 C4 | 4     | Homozygous    | Deletion +0      | Deletion +1 (G)  | Deletion +0     | Deletion -10    |
| MYH7 C6 | 9     | Heterozygous  | WT +1 (G)        | WT +0            | Deletion -9     | Deletion -10    |
| MYH7 C6 | 2     | Homozygous    | Deletion +0      | Deletion +0      | Deletion -9     | Deletion -10    |

**Allele changes are shown relative to predicted cut site (+1 means a 1bp insertion at the predicted cut site).**

**Table V. Off target analysis in CRISPr-treated iPSCs.**

| #  | Guide         | #Mismatches | Location (hg19)            | Annotation (Gene)                      | Result   |
|----|---------------|-------------|----------------------------|----------------------------------------|----------|
| 1  | MYH7_C3_KO_G1 | 3           | chr3:43948037-43948059-    | Intergenic (RP4-672N11.1-RP4-555D20.3) | Negative |
| 2  | MYH7_C3_KO_G2 | 2           | chr3:8242570-8242592:+     | Intron (LMCD1-AS1)                     | Negative |
| 3  | MYH7_C3_KO_G2 | 3           | chr2:196514628-196514650:- | Intron (SLC39A10)                      | Negative |
| 4  | MYH7_C3_KO_G2 | 3           | chr4:25160613-25160635:-   | Exon (SEPSECS)                         | Negative |
| 5  | MYH7_C3_KO_G2 | 4           | chr2:179579180-179579202:- | Exon (TTN)                             | Negative |
| 6  | MYH7_C4_KO_G1 | 2           | chr2:237534886-237534908:- | Intergenic (ACKR3-AC011286.1)          | Negative |
| 7  | MYH7_C4_KO_G1 | 3           | chr18:55971940-55971962-   | Intron (NEDD4L)                        | Negative |
| 8  | MYH7_C4_KO_G1 | 3           | chr1:237019608-237019630:+ | Intron (MTR)                           | Negative |
| 9  | MYH7_C4_KO_G1 | 4           | chrX:33011884-33011906:+   | Intron (DMD)                           | Negative |
| 10 | MYH7_C4_KO_G2 | 3           | chr5:37853503-37853525:+   | Intron (GDNF-AS1)                      | Negative |
| 11 | MYH7_C4_KO_G2 | 3           | chr2:43370103-43370125:-   | Intergenic (AC093609.1-THADA)          | Negative |
| 12 | MYH7_C6_KO_G1 | 3           | chr2:19143341-19143363:+   | Intergenic (AC106053.1-AC092594.1)     | Negative |
| 13 | MYH7_C6_KO_G1 | 3           | chr9:134519754-134519776:- | Intron (RAPGEF1)                       | Negative |
| 14 | MYH7_C6_KO_G2 | 3           | chr22:18336723-18336745:+  | Intron (MICAL3)                        | Negative |
| 15 | MYH7_C6_KO_G2 | 4           | chr2:224012528-224012550+  | Intron (KCNE4)                         | Negative |
| 16 | MYH7_C6_KO_G2 | 4           | chr1:32712994-32713016:-   | Exon (FAM167B)                         | Negative |
